# Supplementary material for: 8-Aminoguanine and Its Actions on Renal Excretory Function
Source: PubMed Central journal article supplement — Hypertension. 2023 Feb 20;80(5):981–94. doi: 10.1161/HYPERTENSIONAHA.122.20760 (PMC10112938; doi:10.1161/hypertensionaha.122.20760), 2023-02-20
Supplement: hyp-80-0981-s002.pdf [file hyp-80-0981-s002.pdf]

**\* Short In Vivo Checklist**

AHA - Preclinical Animal Testing : Prevention of bias is important for experimental cardiovascular research. **This short checklist must be completed, and the answers should be clearly presented in the manuscript as well.** The checklist will be used by reviewers and editors but will not be published. If a revision is requested, you will be required to complete at revision submission a more detailed checklist that will be published with the accepted article.

This study involves animals:

Yes

**Animals**

Species, age, sex, strains, and sources of animals are described: Yes

**Randomization**

Randomization and allocation concealment were performed: Yes

**Blinding**

Blinding was performed: Yes

**Inclusions and Exclusions (a)**

Specific criteria for inclusions and exclusions are specified: N/A

**Inclusions and Exclusions (b)**

Criteria for inclusions and exclusions were set before the study: N/A

**Reporting of Excluded Animals**

All animals excluded after the randomization are reported: N/A

**Statistical Methods**

Statistical Methods are described: Yes

---

Date completed: 01/25/2023 10:16:48

User pid: 18854
